# Supplementary material for: Synthesis and application of magnetic reduced graphene oxide composites for the removal of bisphenol A in aqueous solution—a mechanistic study
Source: Royal Society of Chemistry journal article supplement (doi:10.1039/c6ra23542e), 2016-01-01
Supplement: c6ra23542e1.pdf [file c6ra23542e1.pdf]

### Supporting information for

#### **Synthesis and application of magnetic reduced graphene oxide composites for the removal of Bisphenol A in aqueous solution—a mechanistic study**

Penglei Wang<sup>a,b</sup>, Xin Zhou<sup>a,b</sup>, Yagang Zhang<sup>\*a,b,c</sup>, Lulu Wang<sup>a,b</sup>, Keke Zhi<sup>a,b</sup> and Yingfang Jiang<sup>a,b</sup>

<sup>a</sup> Center for Green Chemistry and Organic Functional Materials Laboratory, Xinjiang Technical Institute of Physics and Chemistry, Chinese Academy of Sciences, Urumqi 830011, China

<sup>b</sup> University of Chinese Academy of Sciences, Beijing 100049, China

<sup>c</sup> Department of Chemical & Environmental Engineering, Xinjiang Institute of Engineering, Urumqi 830023, China

---

Corresponding author: Prof. Yagang Zhang, Tel: +86-18129307169;  
Fax: +86-991-3838957; email: ygzhang@ms.xjb.ac.cn

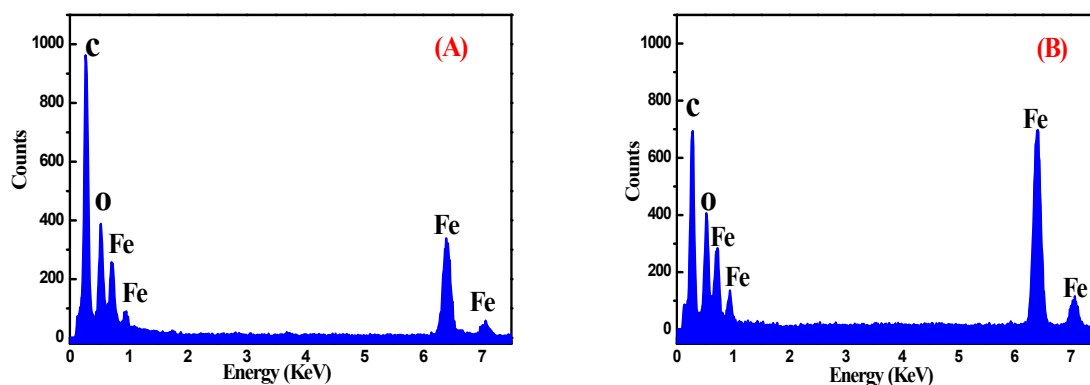

Fig. S1 the EDX analysis showing the presence of C, Fe, and O for MRGO-1 (A) and MRGO-2 (B)

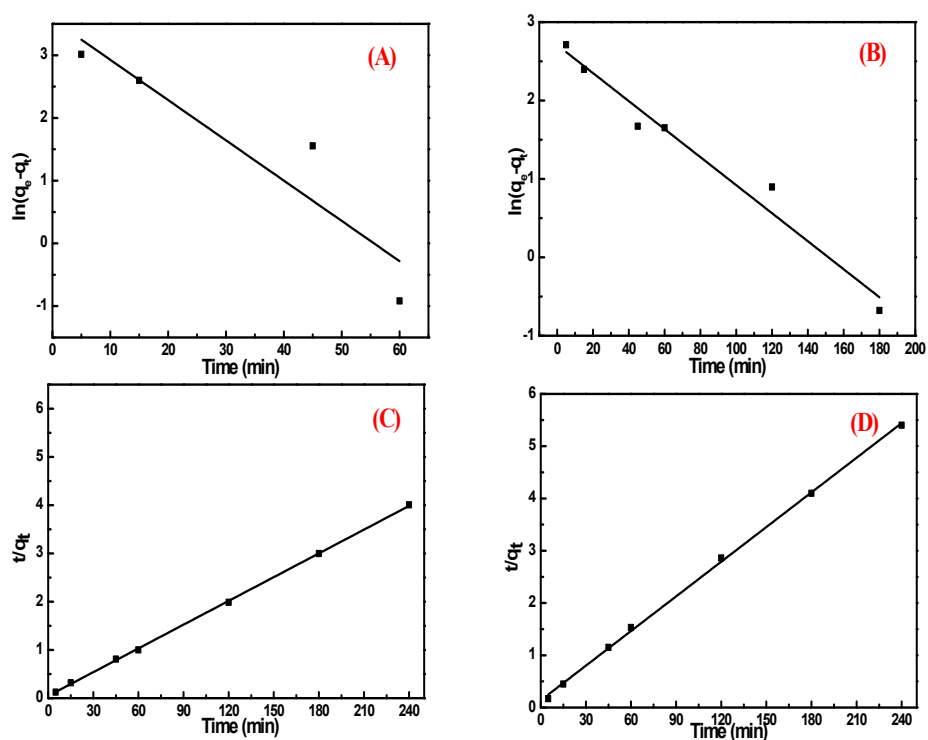

Fig. S2 Kinetic models for BPA adsorption: (A) and (B) pseudo-first-order model and (C) and (D) pseudo-second-order model. (20 mg of adsorbent and 100 mL of 50 mg/L BPA at 298.15 K, pH 6.0).

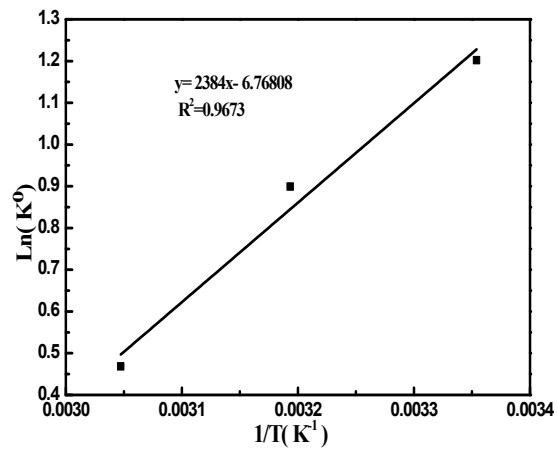

Fig. S3 Linear plot of  $\ln K^\circ$  versus  $1/T$  for the adsorption of BPA by MRGO-1 at 298.15, 313.15, 328.15 K

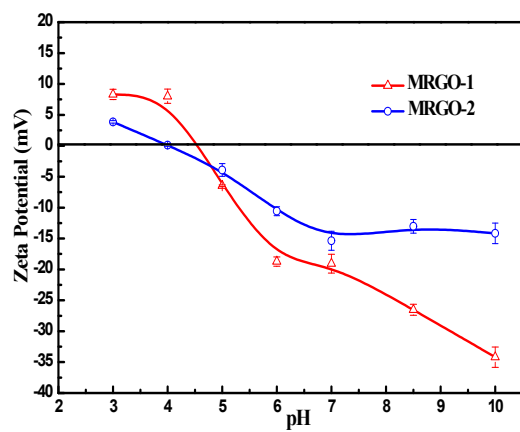

Fig. S4 The zeta potentials of MRGO-1 and MRGO-2
